# Supplementary material for: Euchromatin islands in large heterochromatin domains are enriched for CTCF binding and differentially DNA-methylated regions
Source: PubMed Central journal article supplement (PMC3507770; doi:10.1186/1471-2164-13-566), 2012-10-26

Fig. S5

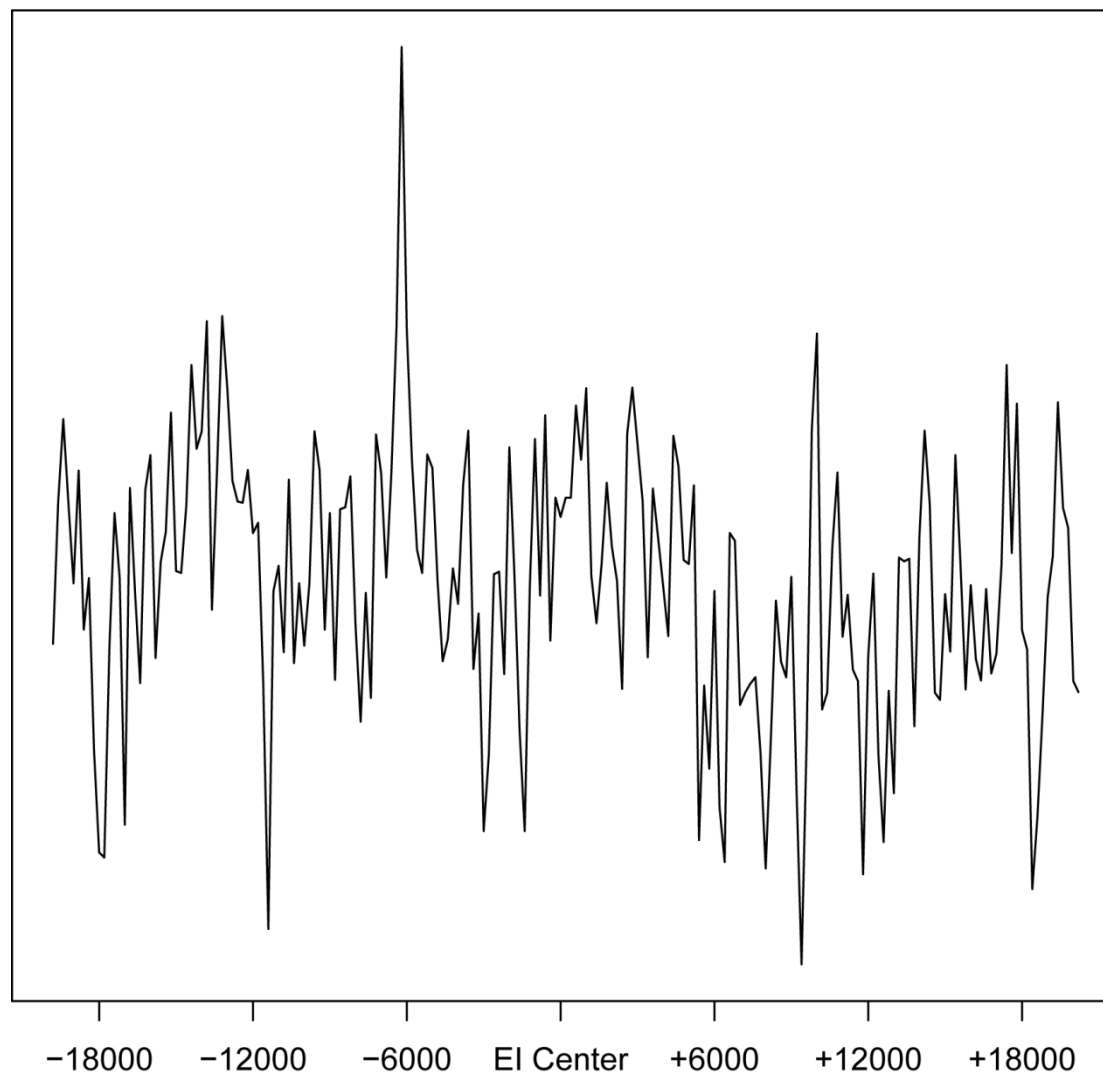

Supplement: 1471-2164-13-566-S7.pdf [file 1471-2164-13-566-S7.pdf]
